# Supplementary material
Source: PubMed Central journal article supplement (PMC5399421)

*Kilanczyk et al. Pharmacological inhibition of spinal cord injury-stimulated ribosomal biogenesis does not affect locomotor outcome.*

## **SUPPLEMENTARY DATA**

**Table S1.** Design of SCI experiments with BMH-21

**Figure S1.** Lists of 2167 (4 h post-SCI) or 4652 (72 h post-SCI) significantly affected genes from data set GEO GSE5296 were analyzed for gene ontology term enrichment as described for Fig. 1B except for A top 24 “biological process” GOs were shown as only 5 or 1 “cellular component” or “molecular function” GO’s passed the significance threshold ( $q < 0.05$ ). Note that unlike at 24 h, only one translation/ribosome associated term was enriched at these time points (“nucleolus”, marked in red, 4 h post SCI). Conversely, transcription- or cell proliferation-associated GO’s were most represented at 4- or 72 h post injury, respectively.

**Figure S2.** Adult rat spinal cord OPCs were cultured in a 96-well plate and treated as indicated. MTT survival assay was performed 24 h later. BMH-21 did not affect OPC cell number suggesting its low toxicity in this white matter cells. Data represent the mean  $\pm$ SD of 9 sister cultures from three independent experiments, ns,  $p > 0.05$  ( $u$ -test).

**Table S1. Design of SCI experiments with BMH-21** (in all cases, 50 kdyn contusive SCI at T9 level was applied using the IH impactor).

| EXPERIMENT                                   | RNA study <sup>a</sup>          |                                           | Locomotor study 1 <sup>b</sup>  |                                           | Locomotor study 2 <sup>b</sup>       |                                                |
|----------------------------------------------|---------------------------------|-------------------------------------------|---------------------------------|-------------------------------------------|--------------------------------------|------------------------------------------------|
| Group designation                            | Vehicle control                 | BMH, 12.5 mg/kg                           | Vehicle control                 | BMH, 12.5 mg/kg                           | Vehicle control                      | BMH, 25 mg/kg                                  |
| Starting/final animal number                 | 3/3                             | 3/3                                       | 10/8 <sup>c</sup>               | 10/10                                     | 11/9 <sup>c</sup>                    | 10/10                                          |
| Actual contusion force (kdyn, average±SD)    | 52.25 ±0.96 <sup>d</sup>        | 51.75 ±2.87 <sup>d</sup>                  | 51.75 ±1.39 <sup>d</sup>        | 52 ±1.05 <sup>d</sup>                     | 50.33 ±0.37 <sup>d</sup>             | 52 ±0.77 <sup>d</sup>                          |
| Tissue displacement (µm, average±SD)         | 533 ±75.6 <sup>d</sup>          | 493.5 ±32.3 <sup>d</sup>                  | 587.6 ±88.92 <sup>d</sup>       | 533.7 ±129.86 <sup>d</sup>                | 581.56 ±51.24 <sup>d</sup>           | 520.5 ±16.2 <sup>d</sup>                       |
| Post SCI treatment ( <i>i.p.</i> injections) | Vehicle at 1- and 24 h post SCI | 12.5 mg/kg BMH-21 at 1- and 24 h post SCI | Vehicle at 1- and 24 h post SCI | 12.5 mg/kg BMH-21 at 1- and 24 h post SCI | Vehicle at 1-, 24, and 48 h post SCI | 25 mg/kg BMH-21 at 1-, 24-, and, 48 h post SCI |

<sup>a</sup> 3 mm-long segment spanning the injury site was collected at 72 h post SCI

<sup>b</sup> hindlimb locomotor function was assessed weekly at weeks 1-6 (study 1) or 1-5 (study 2) *post* SCI.

<sup>c</sup> mortality occurred during the first week after SCI

<sup>d</sup> no significant differences between groups were observed (p>0.05, one-way ANOVA)

A

GO Enrichment (-log (q)) @ 4 h post SCI

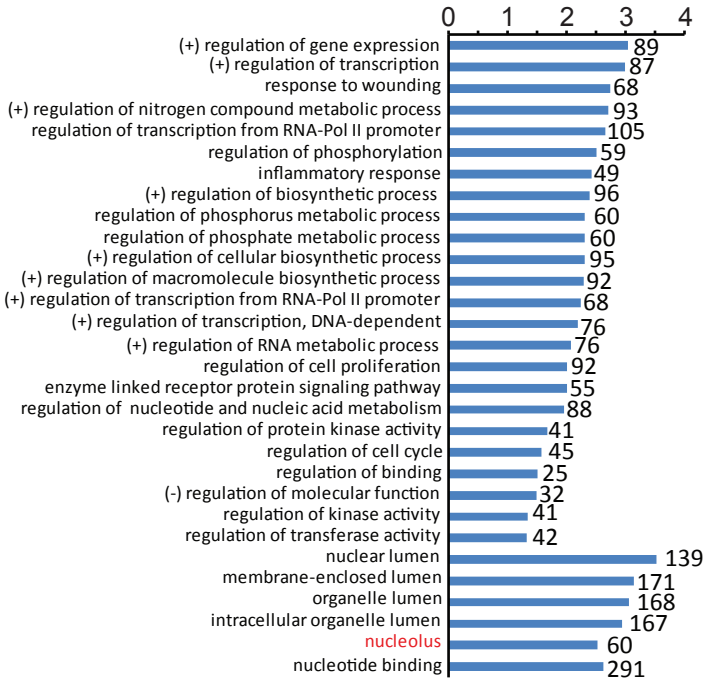

B

GO Enrichment (-log (q)) @ 72 h post SCI

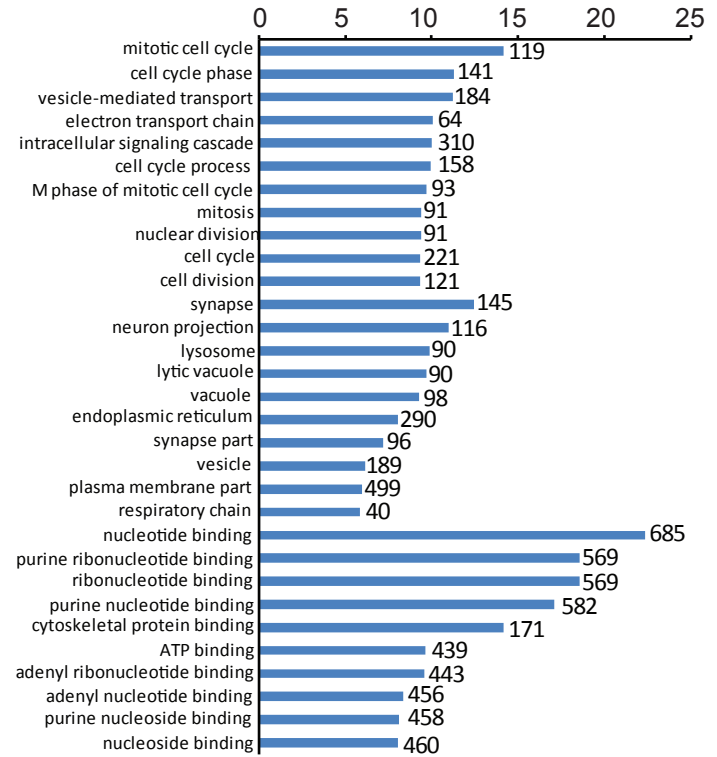

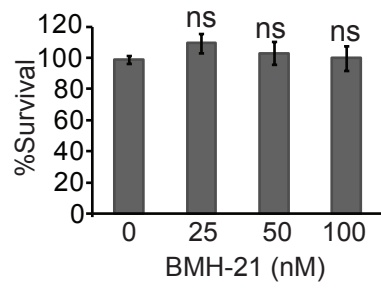

Supplement: NIHMS851959-supplement.pdf [file NIHMS851959-supplement.pdf]
